# Supplementary material for: Macrophage‐derived HMGB1 is dispensable for tissue fibrogenesis
Source: PubMed Central journal article supplement (PMC6996376; doi:10.1096/fba.2018-00035), 2019-02-12

# Supplementary Figure 1:

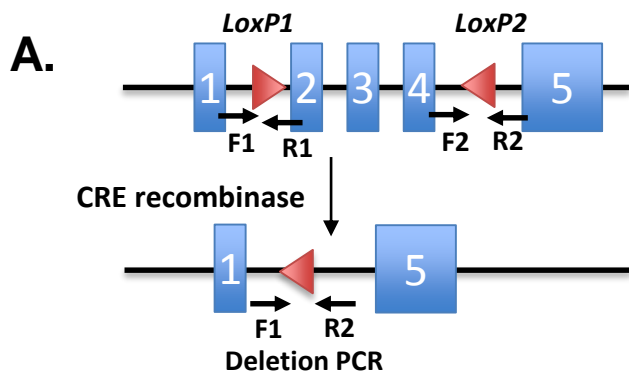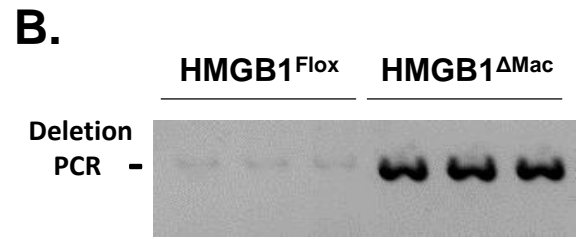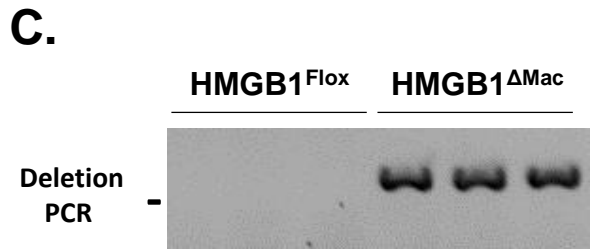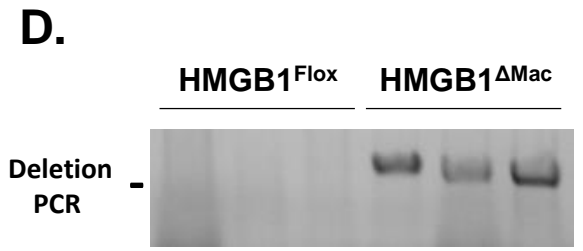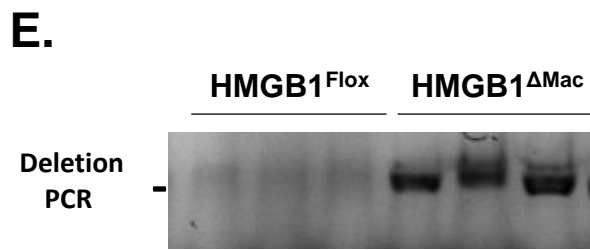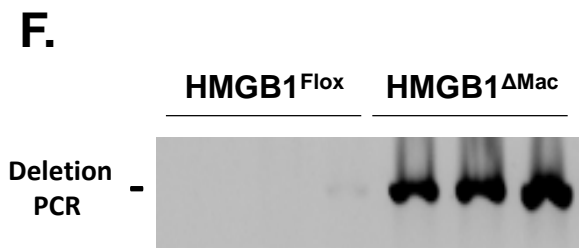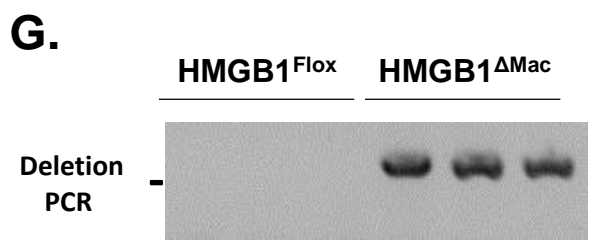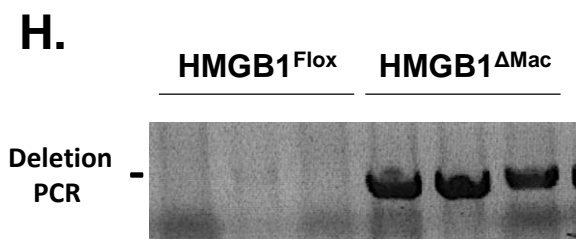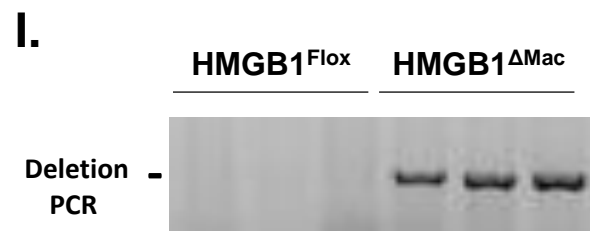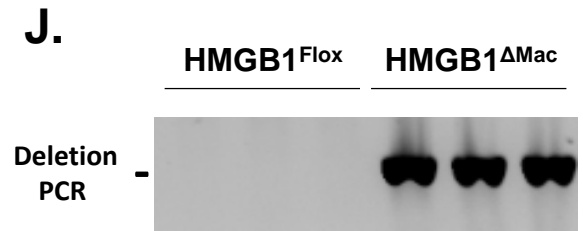

# Supplementary Figure 2:

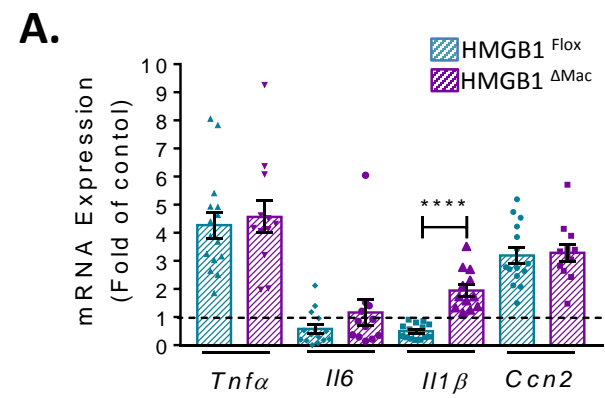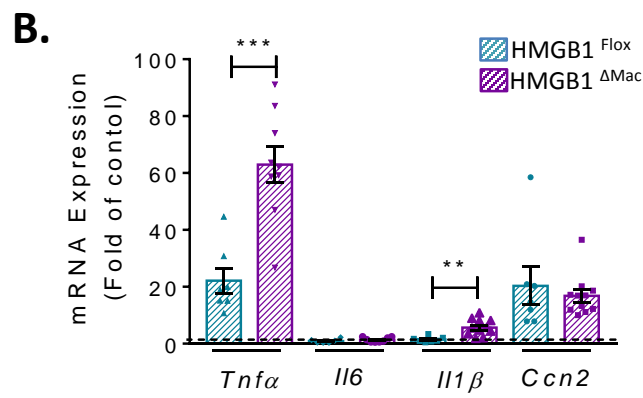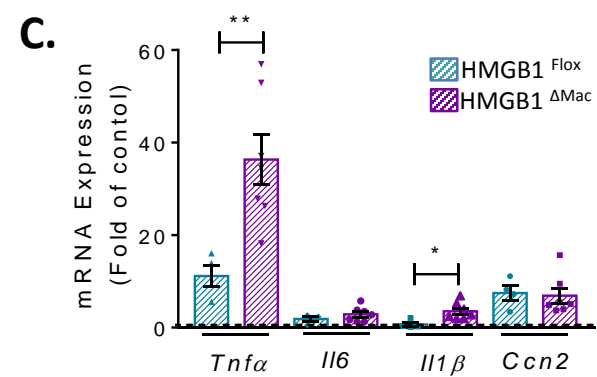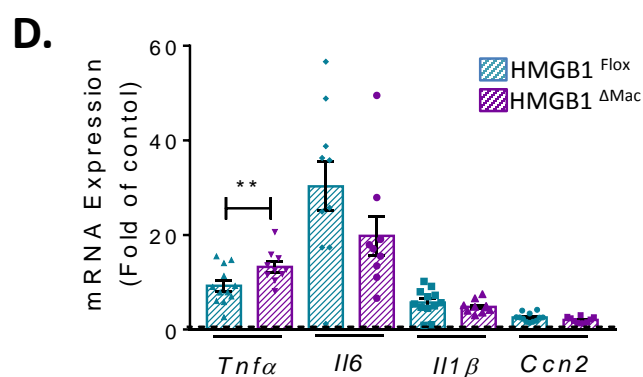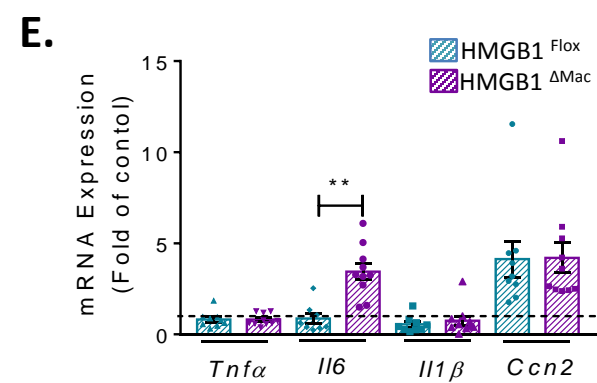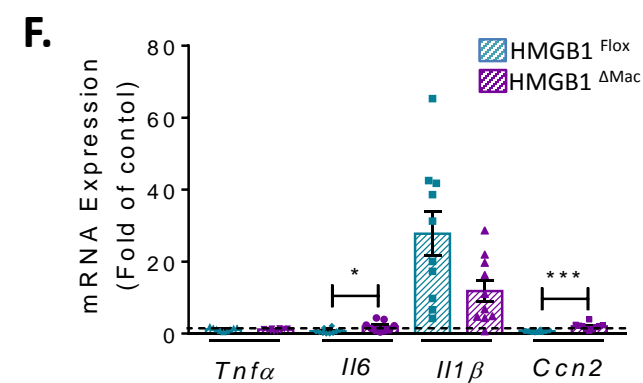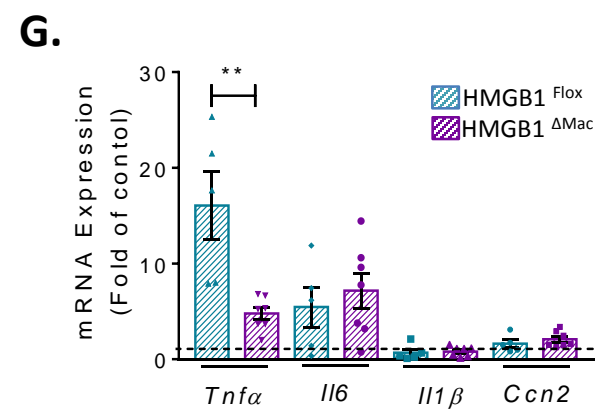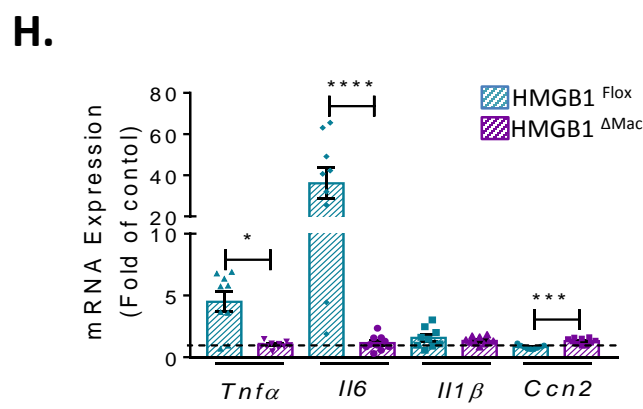

# Supplementary Figure 3:

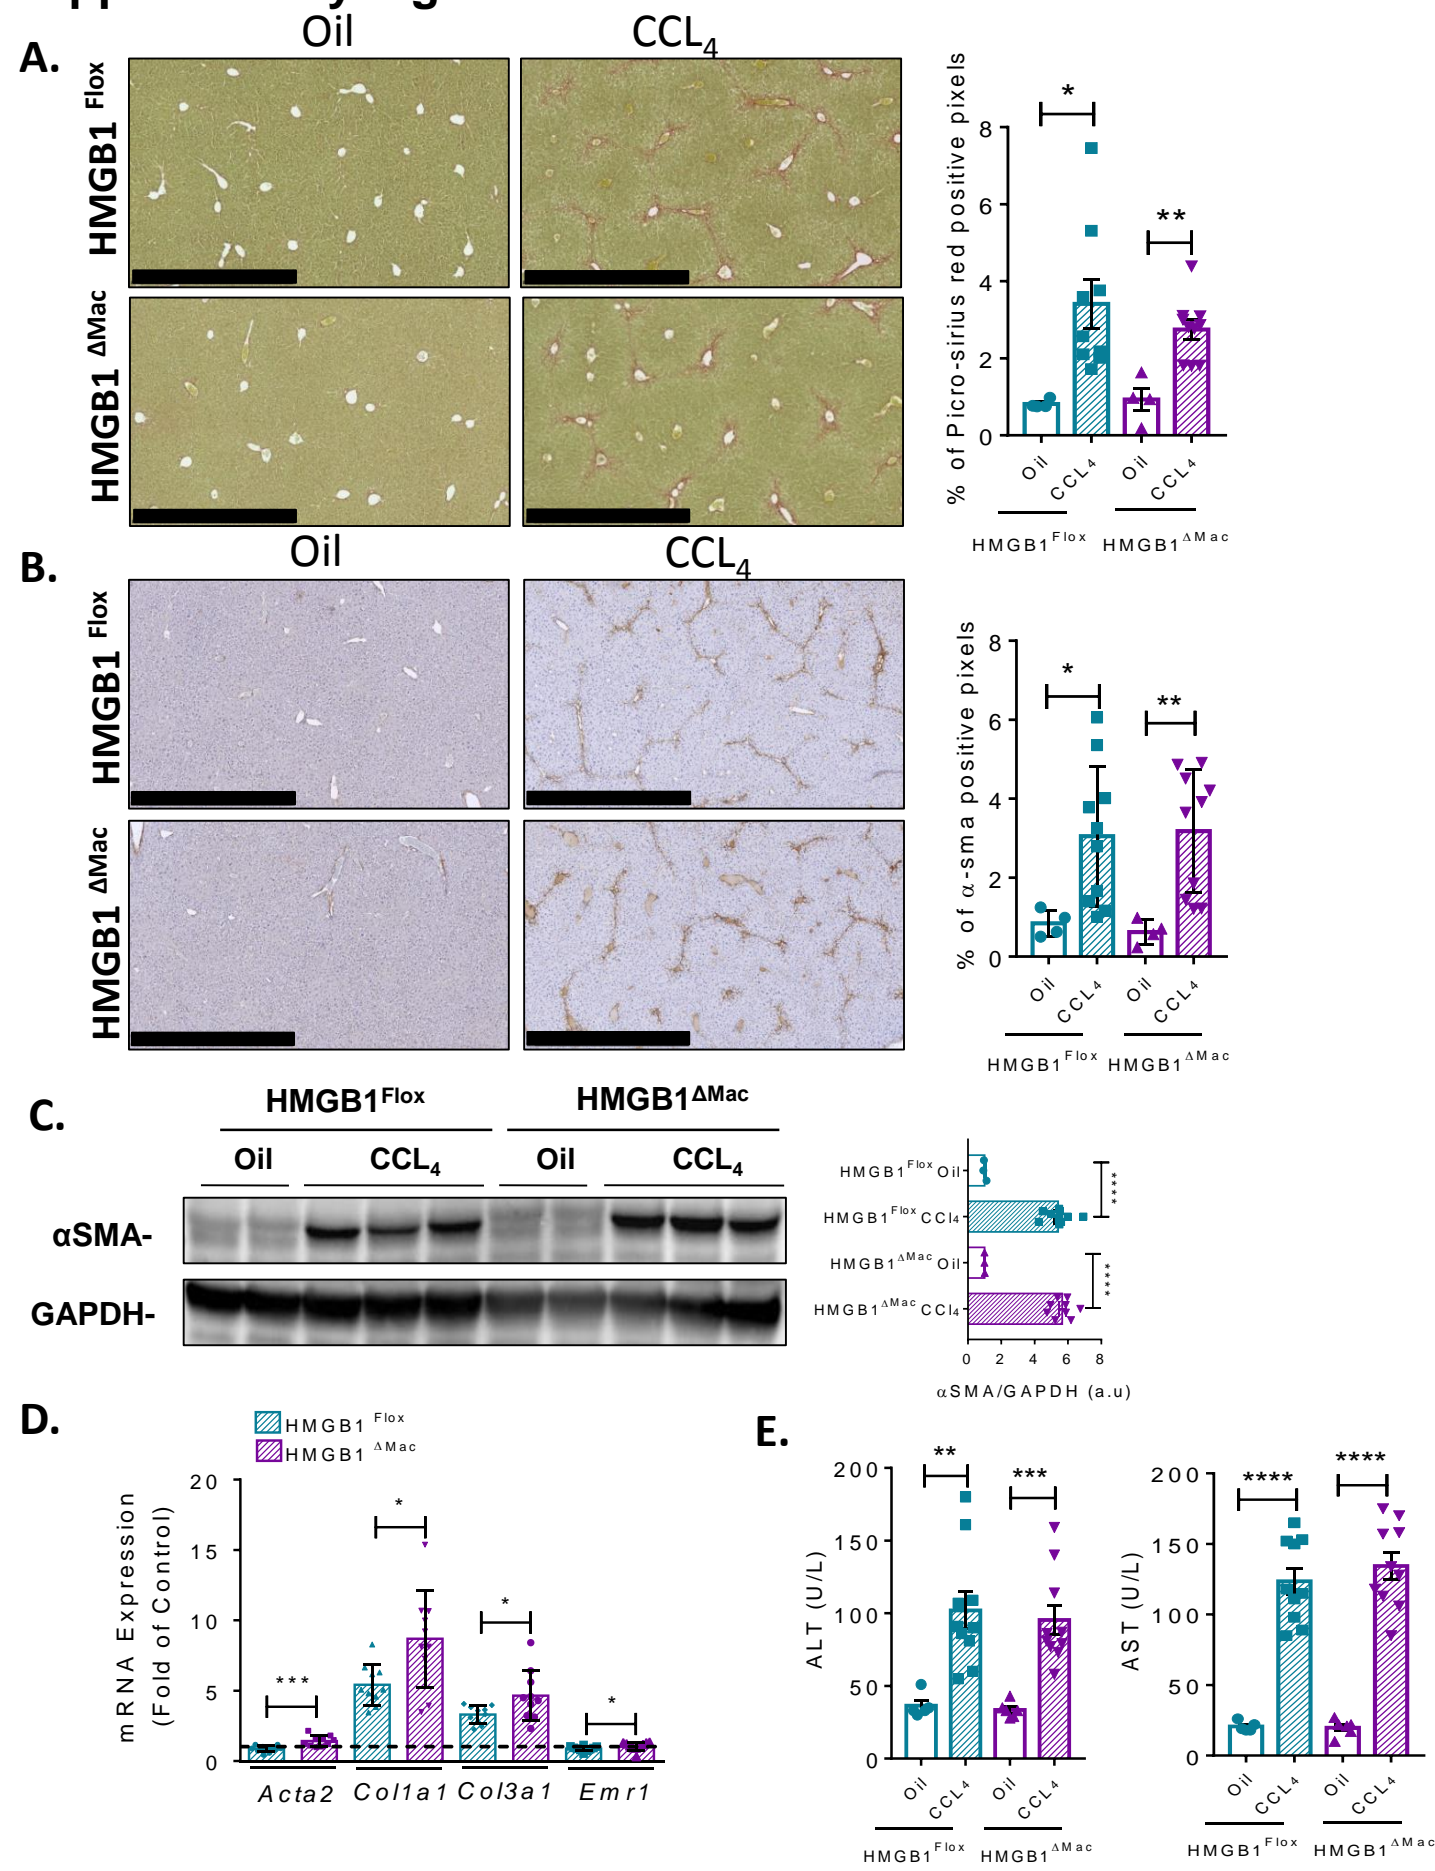

# Supplementary Figure 4:

**A.**

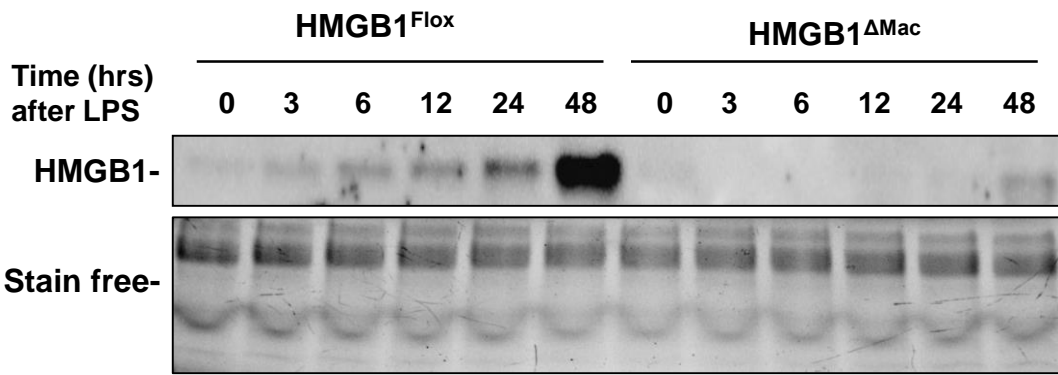

**B.**

***Col1a1***

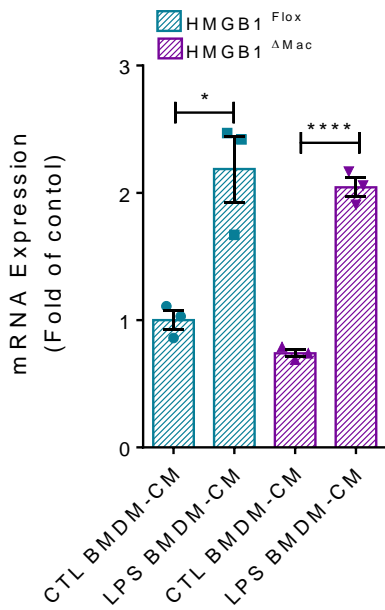

**C.**

***Col1a2***

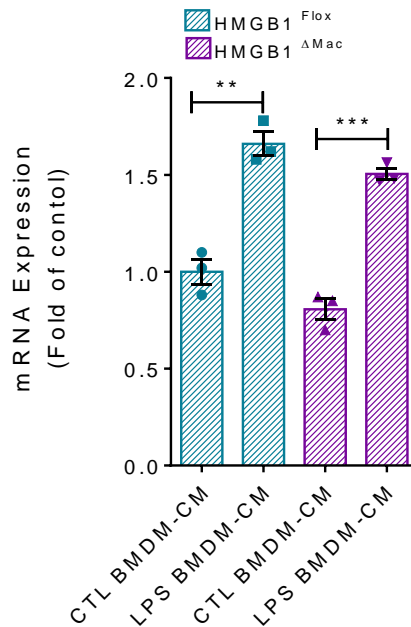

**D.**

***Acta2***

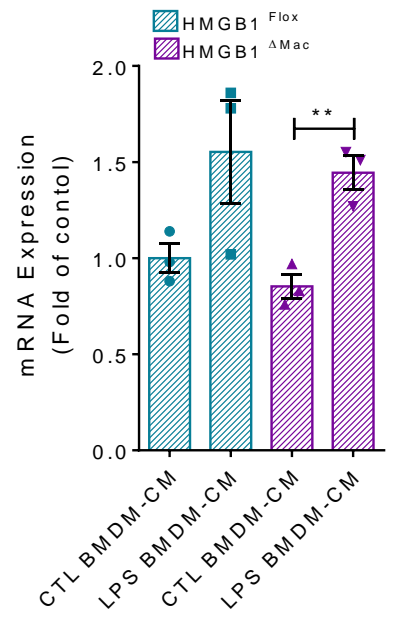

# Supplementary Figure 5:

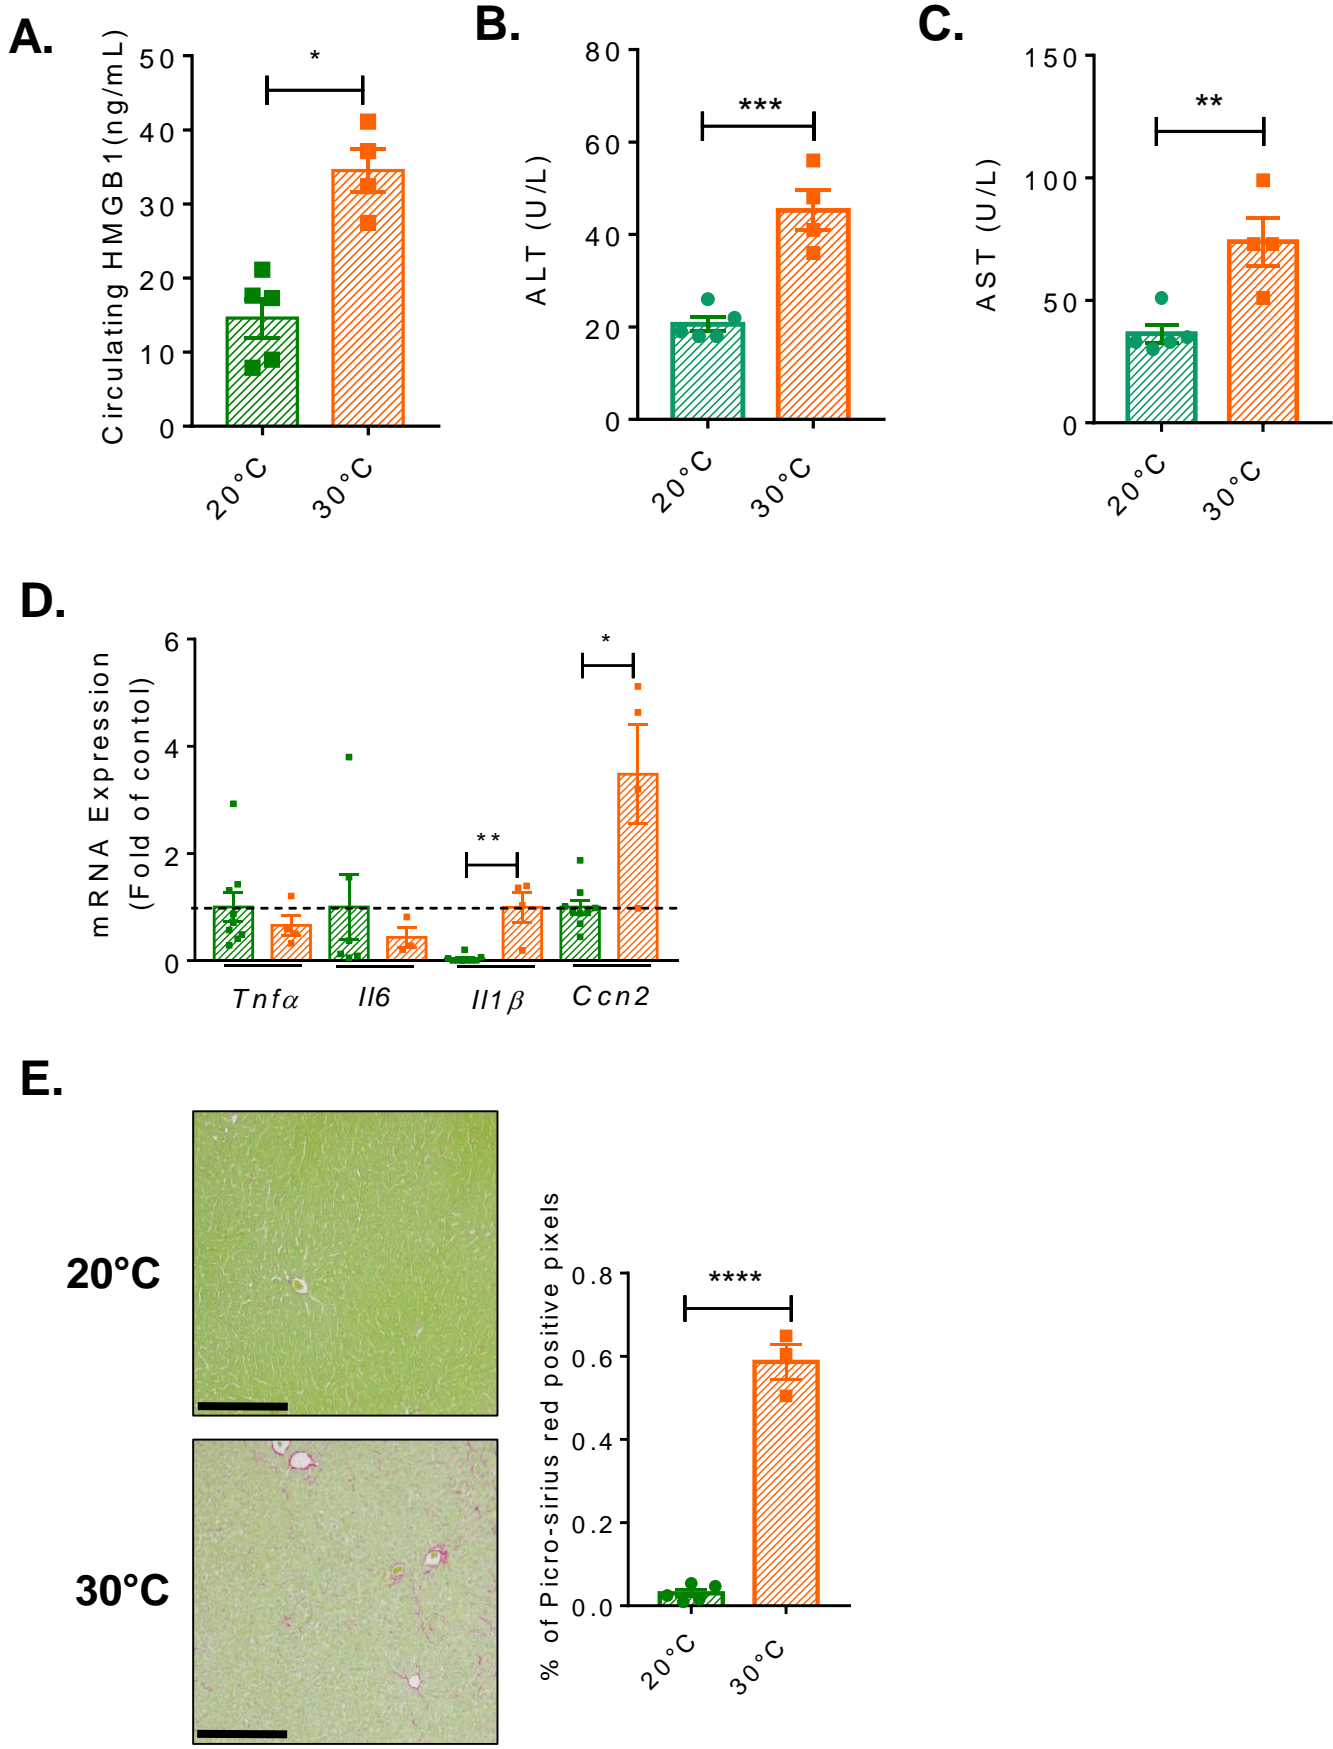

# Supplementary Figure 6:

**A.**

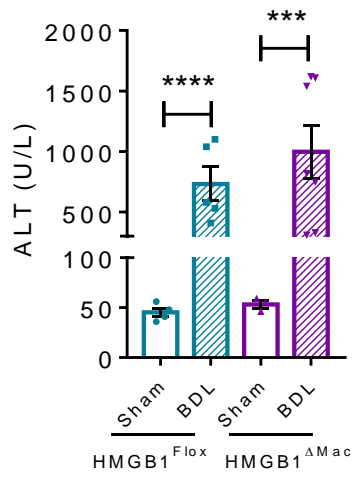

**B.**

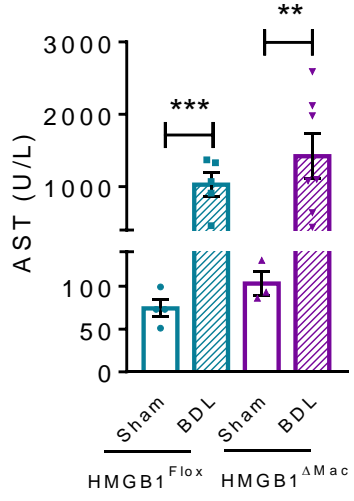

**C.**

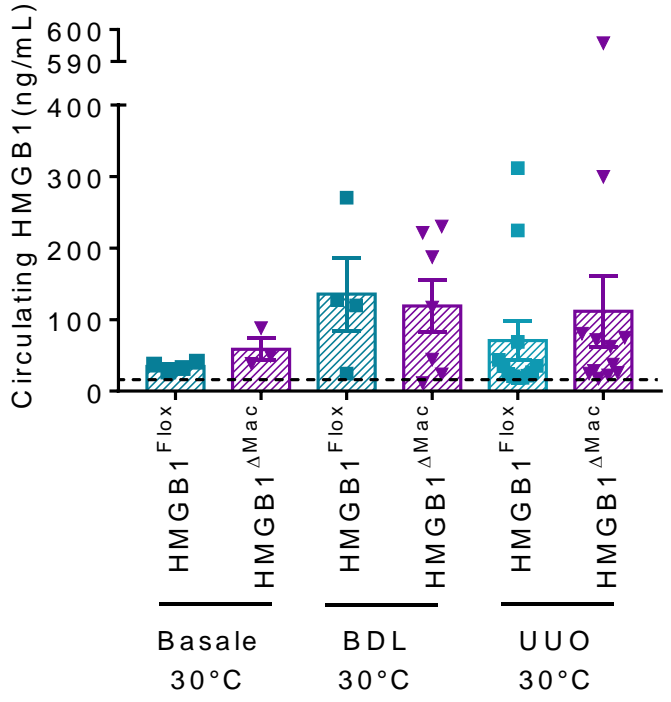

# Supplementary Figure 7:

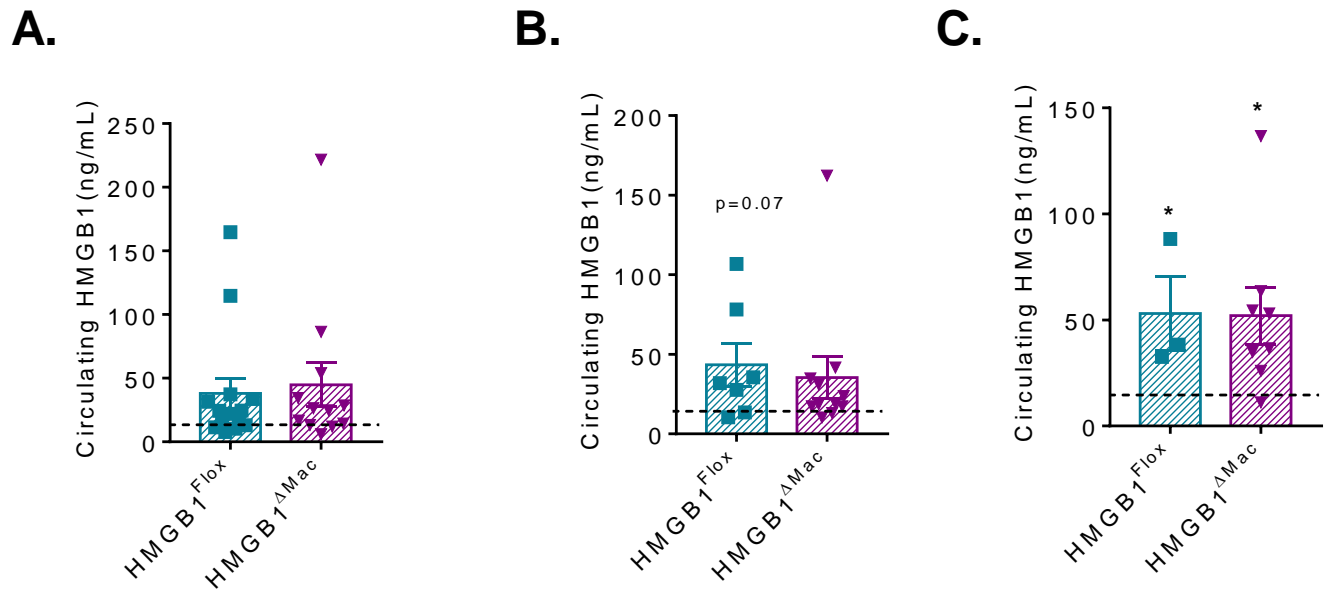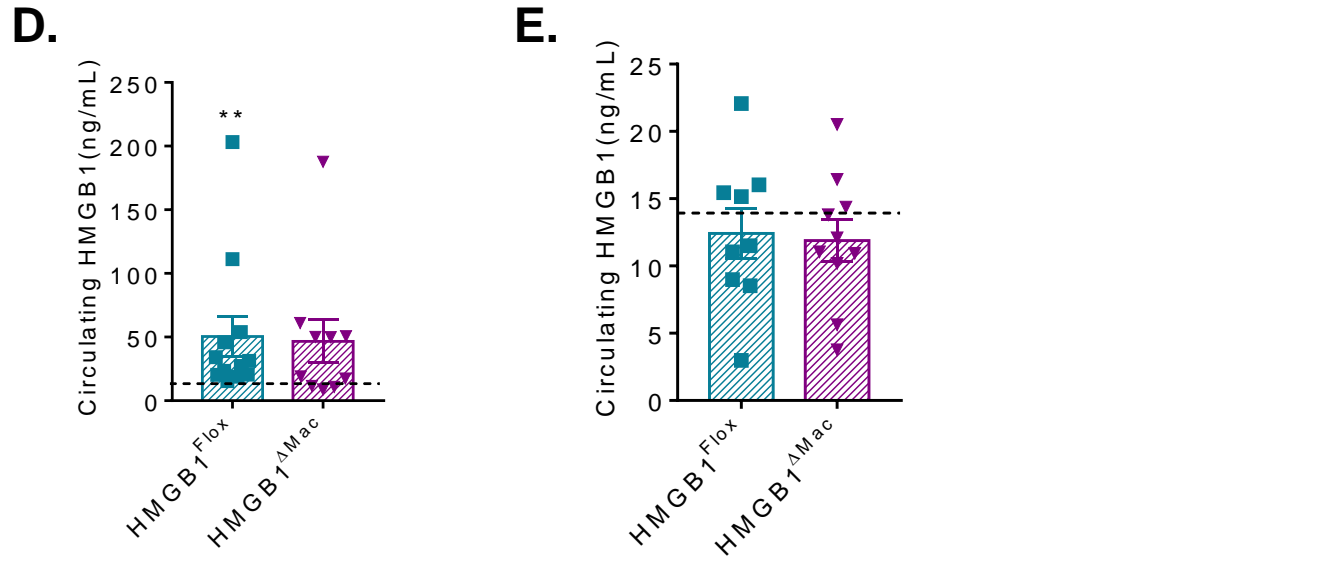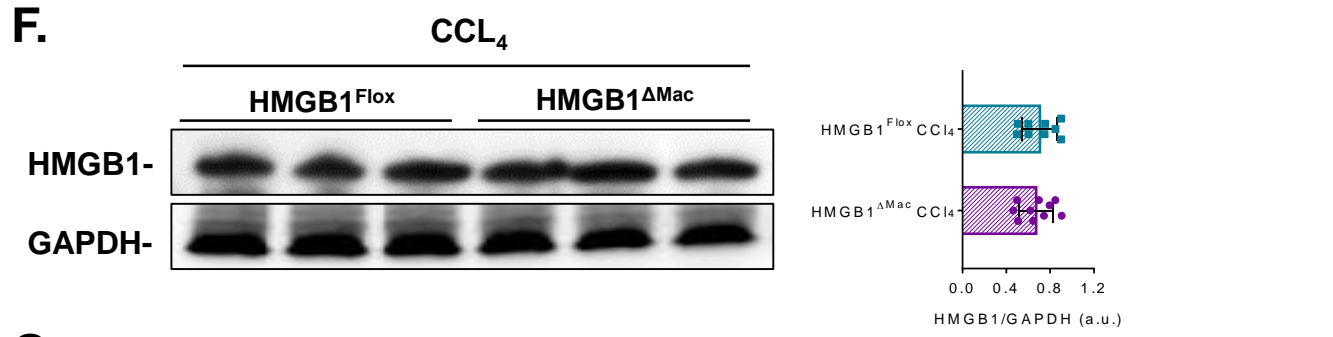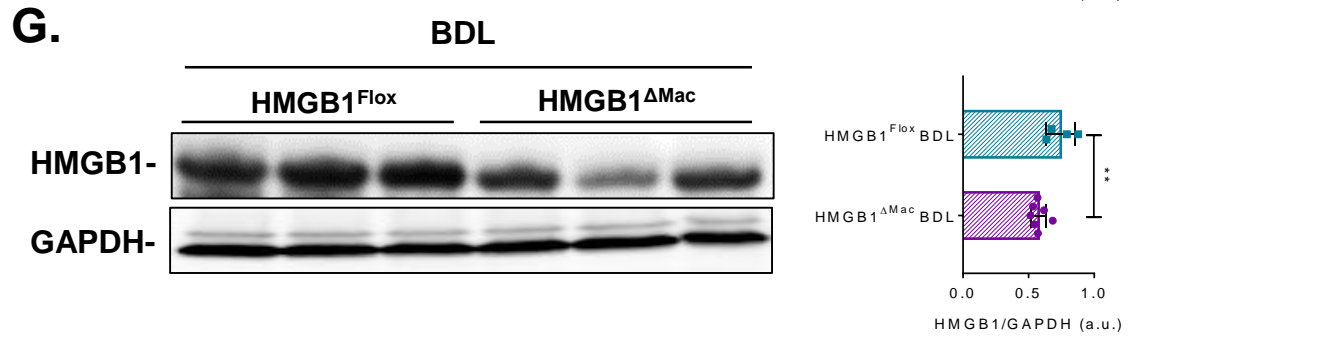

Supplement: FBA2-1-227-s002.pdf [file FBA2-1-227-s002.pdf]
